# Supplementary material for: Adhesion strength of aluminium surfaces coated with silane coupling protective layers via acid–base interactions
Source: Royal Society of Chemistry journal article supplement (doi:10.1039/d5lf00336a), 2026-01-01
Supplement: d5lf00336a1.pdf [file d5lf00336a1.pdf]

Electronic Supporting Information for

# Adhesion Strength of Aluminum Surfaces Coated with Silane Coupling Protective Layers via Acid- Base Interactions

*Kumpei Kobori<sup>1</sup>, Shuji Ogata<sup>2\*</sup>, Shintaro Yamamoto<sup>3</sup>, Yusuke Takahashi<sup>3</sup>, Takayuki Miyamae<sup>1,4,5\*</sup>*

<sup>1</sup>Graduate School of Science and Engineering, Chiba University, 1-33 Yayoi-cho, Inage-ku, Chiba 263-8522, Japan.

<sup>2</sup>Nagoya Institute of Technology, Gokiso-cho, Showa-ku, Nagoya 466-8555, Japan.

<sup>3</sup> Materials Research Laboratory, Technical Development Group, Kobe Steel Ltd. 5-5 Takatsukadai 1-chome, Nishi-ku, Kobe 651-2271, Japan.

<sup>4</sup>Molecular Chirality Research Center, Chiba University, 1-33 Yayoi-cho, Inage-ku, Chiba-shi 263-8522, Japan

<sup>5</sup>Soft Molecular Activation Research Center, Chiba University, 1-33 Yayoi-cho, Inage-ku, Chiba, Chiba 263-8522, Japan

\*Authors to whom correspondence should be addressed: [ogata@nitech.ac.jp](mailto:ogata@nitech.ac.jp) and [t-miyamae@chiba-u.jp](mailto:t-miyamae@chiba-u.jp)

### ***S.1 Simulation system to analyze acidity: BTSE connected to HO-terminated $\gamma$ -alumina***

When gradually exposed to oxygen in the air, aluminum metal develops a surface oxide layer with a depth ranging from 5 to 40 Å.<sup>1-3</sup> The internal structure of this surface oxide is not well understood experimentally. Theoretical calculations of free energy, which account for elastic deformation due to lattice mismatch at the Al-oxide interface, suggested that the surface oxide on Al (111) adopts an amorphous structure at depths of 5–10 Å and  $\gamma$ -alumina at greater depths under ordinary conditions.<sup>2</sup> The  $\gamma$ -alumina transforms to  $\alpha$ -alumina (the most stable phase of alumina) at high temperatures ( $\sim 900$  K).<sup>3</sup> With this in mind, we prepared a  $\gamma$ -alumina slab as a substrate to which a silane compound connects for the present simulations as follows.

The atomic structure of  $\gamma$ -alumina is usually described as a defective spinel.<sup>4</sup> We constructed the spinel (i.e.,  $\text{MgAl}_2\text{O}_4$ ) cubic unit cell with a volume of  $(7.929\text{\AA})^3$ , consisting of 56 atoms. In this structure, 32 O atoms formed the face-centered cubic (FCC) lattice, while 8 Mg (16 Al) atoms occupied the tetrahedral (octahedral) sites of the FCC lattice. All Mg atoms were replaced by Al to make a unit cell with a stoichiometry ratio of Al:O = 3:4. The  $\gamma$ -alumina slab was created by assembling  $3 \times 2 \times 1$  unitcells and then randomly removing Al atoms from the octahedral sites to achieve a stoichiometry ratio of Al:O = 2:3. Side lengths of the  $\gamma$ -alumina slab were  $(L_x, L_z) = (23.787, 15.858)$  Å under periodic boundary conditions (PBCs) with a  $y$ -depth of 7.929 Å.

Proper termination of the  $\gamma$ -alumina surface is crucial. Previous experiments indicated that the point of zero charge (PZC) for  $\gamma$ -alumina is 9.2, which was anticipated to result from three  $pK_a$  relating to three types of surface sites:<sup>5</sup>  $pK_a 12.5$  for the adsorption equilibration  $(\text{Al}_{oh})_2 - \text{OH}' \rightleftharpoons (\text{Al}_{oh})_2 - \text{O}$ , 9.6 for  $\text{Al}_{oh} - (\text{OH})' \rightleftharpoons \text{Al}_{oh} - (\text{OH})'$ , and 6.7 for  $\text{Al}_{th} - (\text{OH})' \rightleftharpoons \text{Al}_{th} - (\text{OH})'$ , where  $\text{Al}_{oh}$  and  $\text{Al}_{th}$  represent octahedral and tetrahedral Al, respectively, and  $\text{H}'$  and  $(\text{OH})'$  are adsorbed from the surrounding water. Since no  $\text{Al}_{th}$  is present

on the top surface of present  $\gamma$ -alumina model, we anticipated the presence of  $(Al_{oh})_2 - OH'$  and  $Al_{oh} - (OH)'H'$  under pH 7, meaning the number of  $H'$  exceeds that of  $(OH)'$ . Considering this, we initially placed 24 OH and 36 H on the top surface of  $\gamma$ -alumina. Through a density-functional theory (DFT)-based molecular dynamics (MD) simulation for thermalization conducted for 5 ps at 298 K, we removed 15  $H_2O$  and 2  $H_2$  that formed and desorbed from the surface. This process resulted in 12 surface-sites of  $Al_2-OH$ , 5 of  $Al-OHH$ , and 4 of  $Al-OH$  to mimic a HO-terminated  $\gamma$ -alumina, as shown in **Figs. 2 (a) and (b)** in the text.

### *S.2 Settings of DFT-MD simulation*

We applied the DFT for electrons to calculate the forces on atoms required for MD simulation and for configuration sampling.<sup>6</sup> The adiabatic approximation was adopted for electrons, that is, electronic structure is calculated in the ground state for a given set of nuclear positions at each timestep. Since statistical configuration average is not affected by the mass change of H in the adiabatic approximation, deuterium mass was set for H to allow the use of a timestep of 1.4 fs.<sup>6-10</sup> The Troullier and Martins (TM)-type norm-conserving pseudopotentials<sup>11</sup> were used for the valence electrons. The Perdew-Burke-Ernzerhof-type (PBE) generalized gradient approximation (GGA) exchange-correlation functional<sup>12</sup> was adopted in the real-space-grid type DFT code (DC-RGDFT).<sup>6</sup> The choice of PBE-GGA is because it has been successfully used for calculations of protonation degrees for both inorganic and organic systems in water as well as microscopic structure of liquid water.<sup>7-10,13</sup> We set the grid size  $h = 0.40a_B$  with Bohr radius  $a_B = 0.5292 \text{ \AA}$  to use DC-RGDFT, which corresponds to the cutoff energy  $\left(\frac{\pi}{h}\right)^2 Ry = 840 \text{ eV}$  ( $1 \text{ Ry} = 13.61 \text{ eV}$ ) in the plane-wave implementation of DFT. A finer grid of  $h/3$  was also set around each C, N, and O nucleus for the pseudopotentials.<sup>6</sup>

## References

- 1 J. M. McHale, A. Auroux, A. J. Perrotta, A. Navrotsky, *Science*, 1997, **227**, 788–791.
- 2 L. P. H. Jeurgens, W. G. Sloof, F. D. Tichelaar, E. J. Mittmeijer, *Phys. Rev. B*, 2000, **62**, 4707–4719.
- 3 M. A. Trunov, M. Schoenitz, E. L. Dreizin, *Propel. Explos. Pyrotech.*, 2005, **30**, 36–43.
- 4 F. H. Streitz, J. W. Mintmire, *Phys. Rev. B*, 1999, **60**, 773–777.
- 5 C. Cristian, J. Jagiello, J. A. Schwarz, *Langmuir*, 1993, **9**, 1754–1765.
- 6 N. Ohba, S. Ogata, T. Kouno, T. Tamura, R. Kobayashi, *Comput. Phys. Commun.*, 2012, **183**, 1664–1673.
- 7 S. Ogata, M. Uranagase, Y. Takahashi, T. Kishi, *J. Phys. Chem. B*, 2021, **125**, 8989–8996.
- 8 S. Ogata, M. Uranagase, *J. Phys. Chem. B*, 2023, **127**, 2629–2638; *ibid.* 2023, **127**, 6833–6834.
- 9 S. Ogata, M. Uranagase, Y. Takahashi, T. Kishi, *MRS Commun.*, 2022, **12**, 315–321.
- 10 P. N. A. M. Ariff, D. M. Sedgwick, K. Iwasawa, T. Kiyono, Y. Sumii, R. Ikuta, M. Uranagase, H. Kawahara, S. Fustero, S. Ogata, N. Shibata, *J. Am. Chem. Soc.*, 2024, **146**, 26435–26441.
- 11 N. Troullier, J. L. Martins, *Phys. Rev. B*, 1991, **43**, 1993–2006.
- 12 J. P. Perdew, K. Burke, M. Ernzerhof, *Phys. Rev. Lett.*, 1996, **77**, 3865–3868; Erratum. *Phys. Rev. Lett.*, 1997, **78**, 1396.
- 13 M. J. Gillan, D. Alfè, A. Michaelides, *J. Chem. Phys.*, 2016, **144**, 130901.

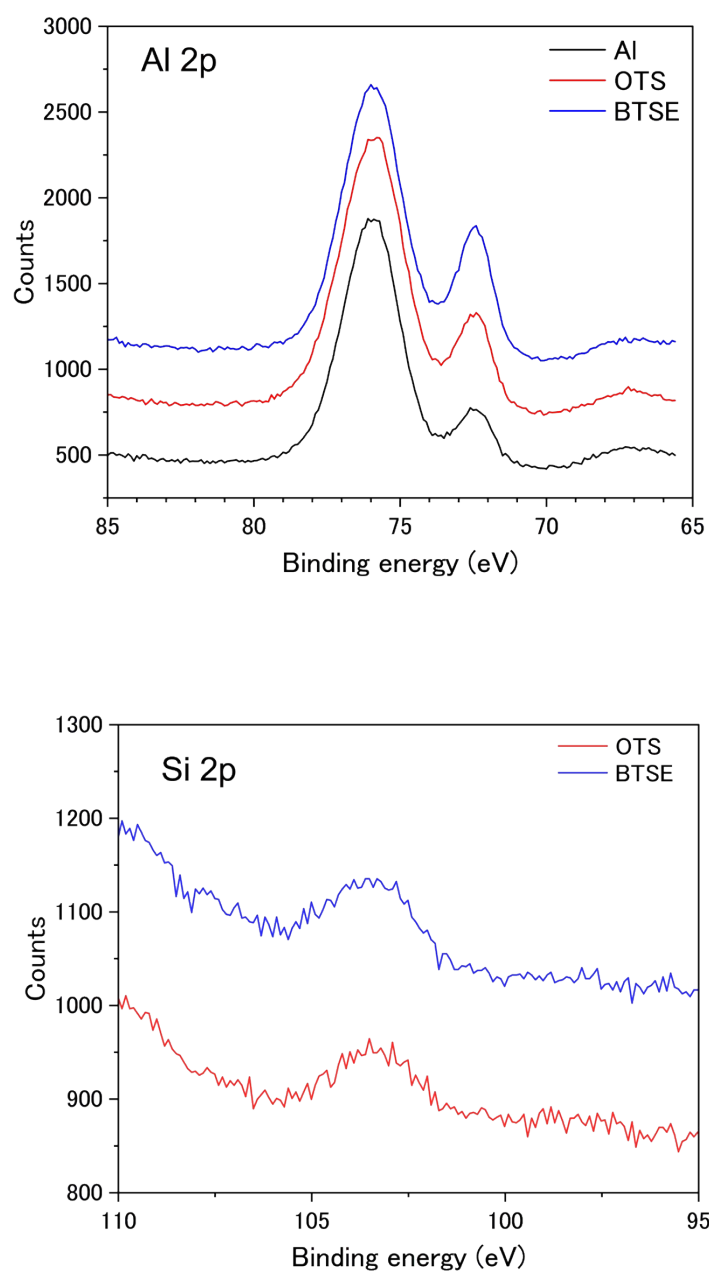

**Figure S1.** XPS spectra of the Al2p region and Si2p region for the chemically polished Al substrate (black), OTS-treated (red), and BTSE-treated (blue) samples. XPS measurements were performed using JPS-9030 manufactured by JEOL Ltd. The X-ray source used in XPS was AlK $\alpha$ .

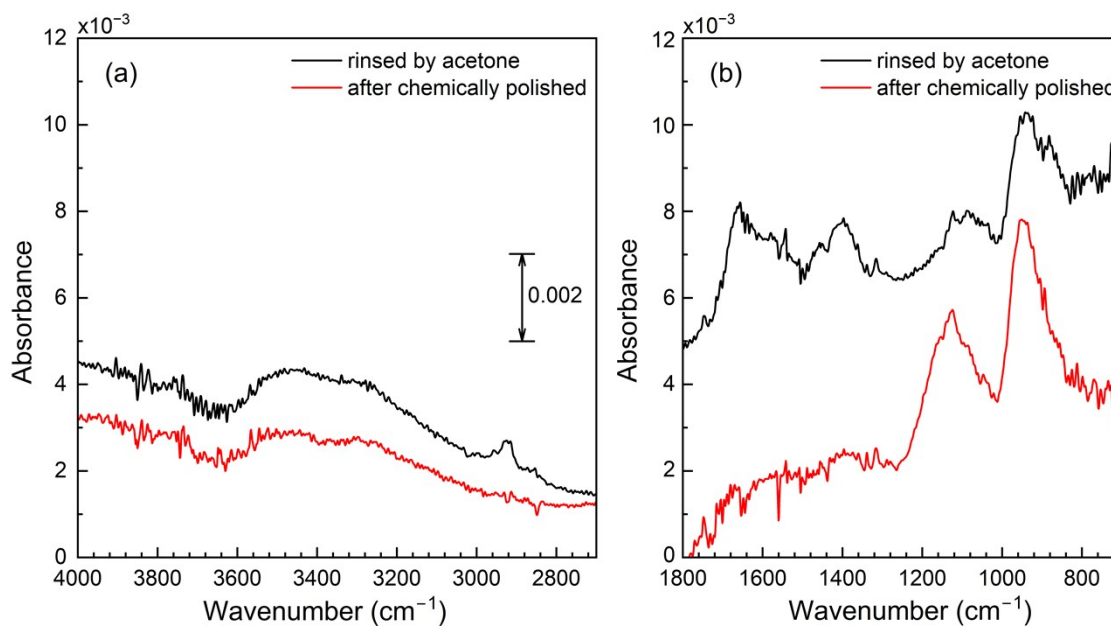

**Figure S2.** ATR-IR spectra of acetone-cleaned Al substrate (black line) and chemically polished Al substrate (red line). (a) 4000–2700  $\text{cm}^{-1}$  and (b) 1800–700  $\text{cm}^{-1}$ . ATR-IR measurements were performed using a Fourier transform infrared spectrometer (FT-IR-6600) manufactured by JASCO Co. with 128 accumulation cycles and a resolution of 4  $\text{cm}^{-1}$ . A diamond prism was used for ATR measurements

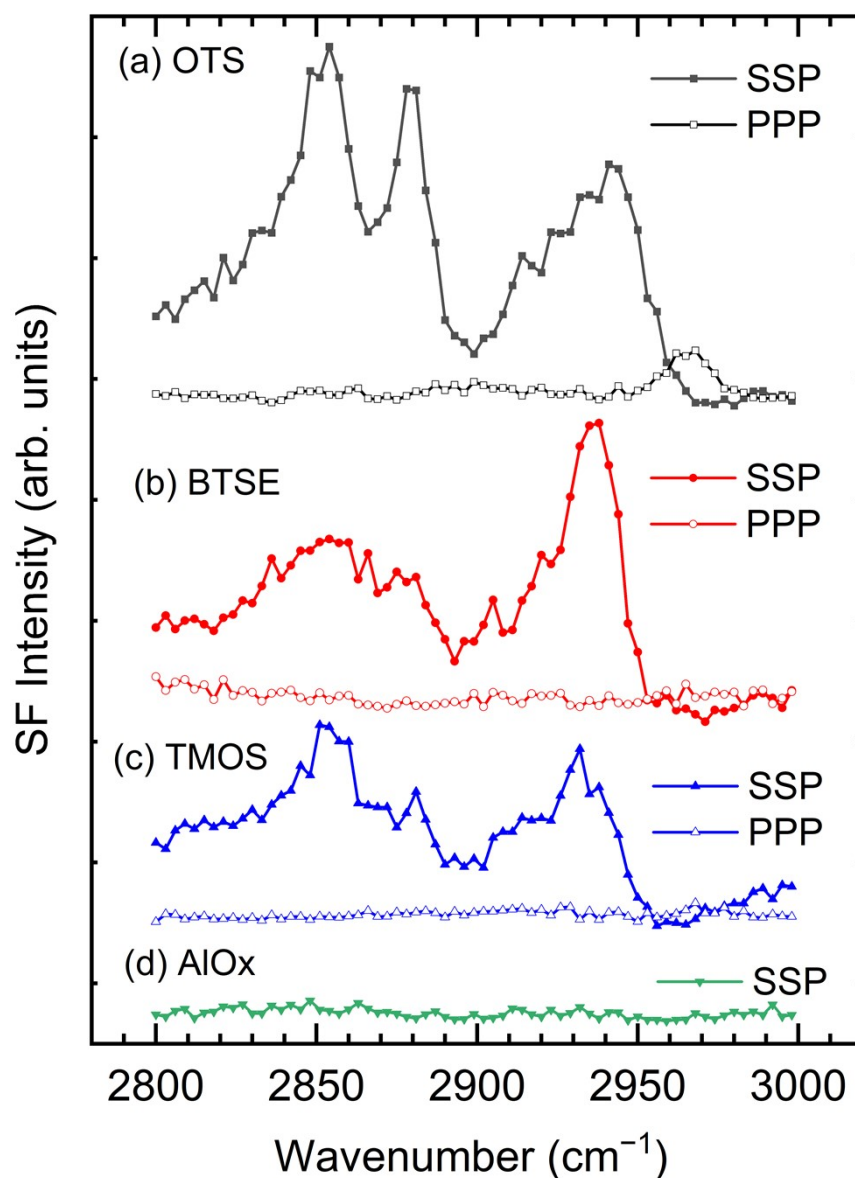

**Figure S3.** SSP and PPP polarized SFG spectra of (a) OTS adsorbed on  $\text{AlO}_x$  substrates, (b) BTSE adsorbed on  $\text{AlO}_x$  substrates, (c) TMOS adsorbed on  $\text{AlO}_x$  substrates, and (d) SSP polarized SFG spectrum of  $\text{AlO}_x$ -coated  $\text{CaF}_2$  surface. The deposition conditions of silane agents are compared under identical conditions. Spectra are offset for clarity

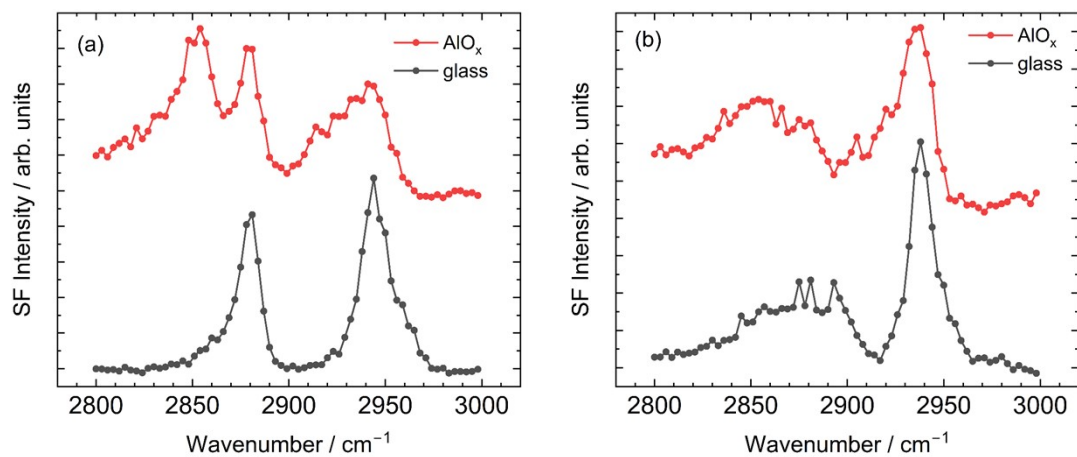

**Figure S4.** SSP polarized SFG spectra of (a) OTS adsorbed on glass and  $\text{AlO}_x$  substrates, and (b) BTSE adsorbed on glass and  $\text{AlO}_x$  substrates. The deposition conditions were compared under identical conditions.



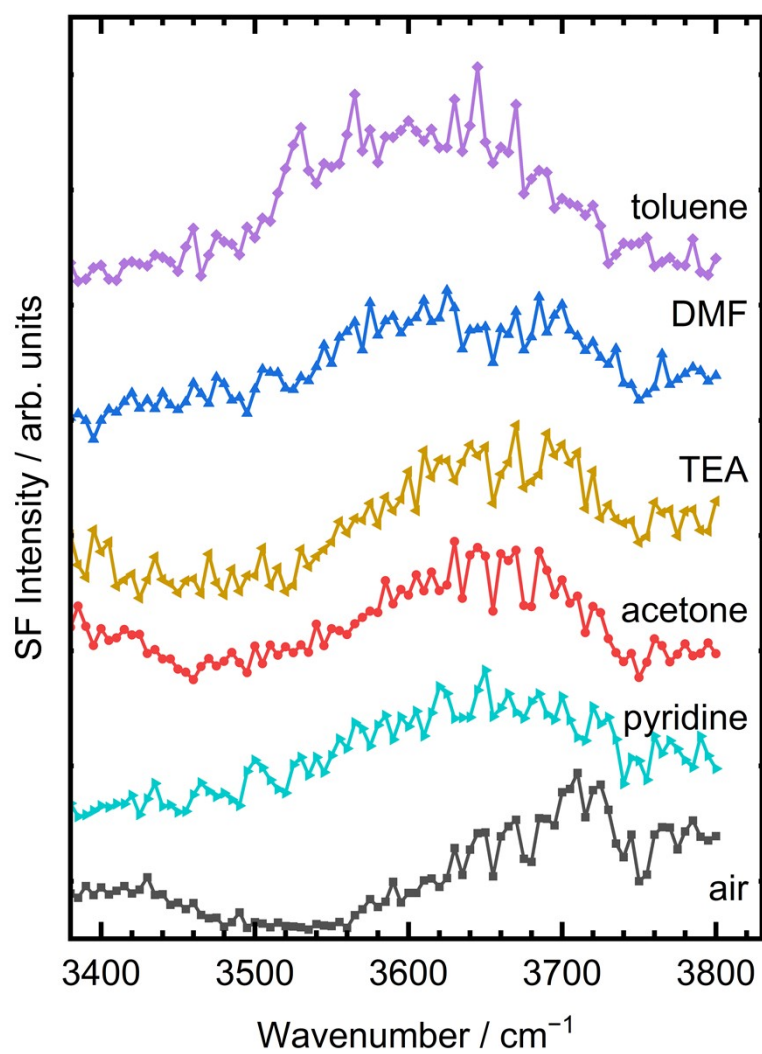

**Figure S5.** SSP polarized SFG spectra collected for five different liquids in contact with AlO<sub>x</sub>-coated CaF<sub>2</sub> surfaces in the hydroxyl stretching region. The spectra are offset for clarity.

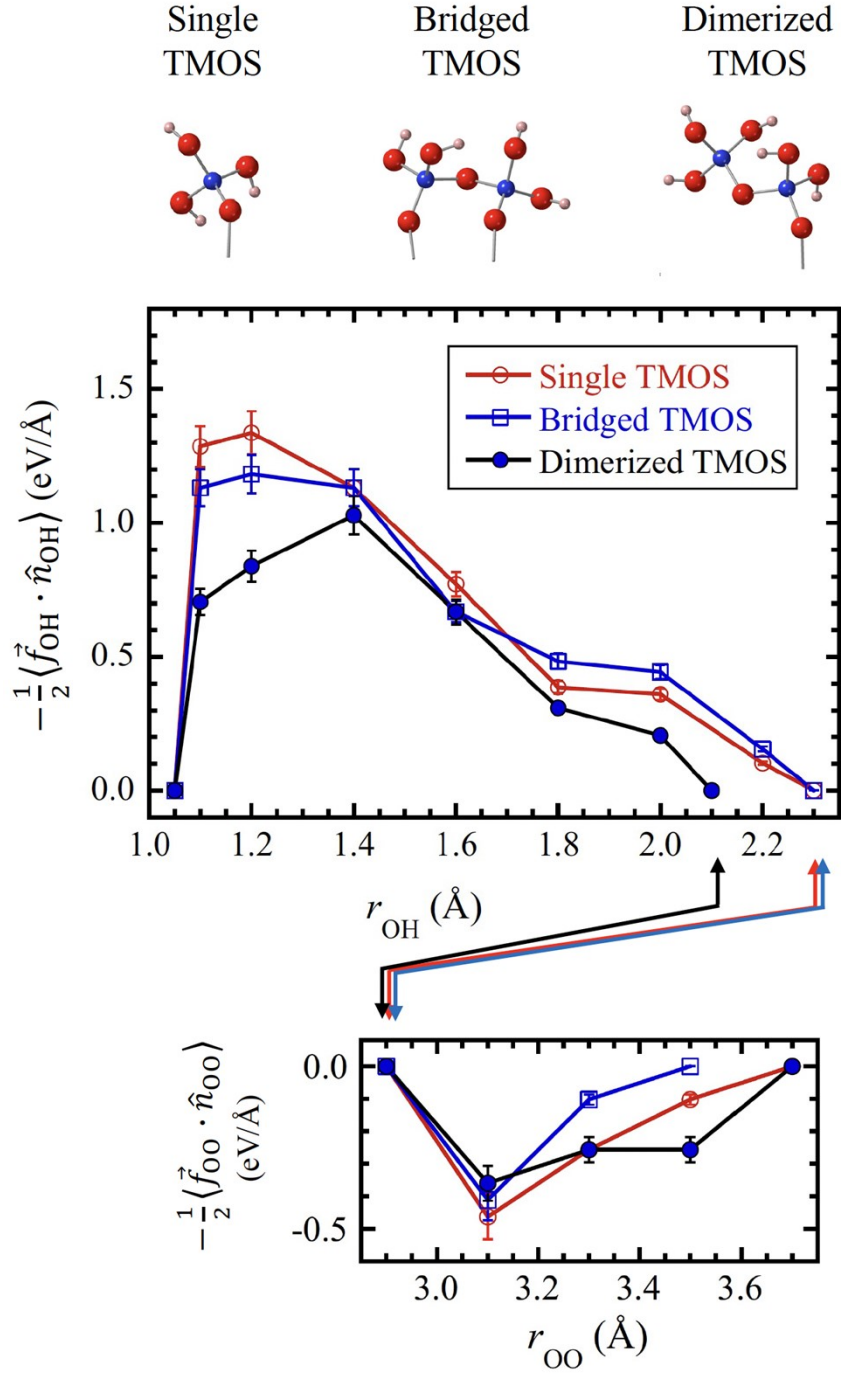

**Figure S6.** (top) Single, bridged, and dimerized forms of TMOS connected to HO-terminated  $\gamma$ -alumina. (Middle) The DFT-MD sampling result of  $\langle \vec{f}_{OH} \cdot \hat{n}_{OH} \rangle$  at each  $r_{OH}$  for subprocess-(i) in the  $H^+$ -shift method. (Bottom) Same as (Middle), but of  $\langle \vec{f}_{OO} \cdot \hat{n}_{OO} \rangle$  at each  $r_{OO}$  for subprocess-(ii).

**Table S1.** Fitting summary table for SFG spectra in Figure 6.

| <b>OTS</b>     |       | Peak 1                         |                                | Peak 2 |                                |                                |
|----------------|-------|--------------------------------|--------------------------------|--------|--------------------------------|--------------------------------|
| <i>Solvent</i> | $A_q$ | $\omega_q$ (cm <sup>-1</sup> ) | $\Gamma_q$ (cm <sup>-1</sup> ) | $A_q$  | $\omega_q$ (cm <sup>-1</sup> ) | $\Gamma_q$ (cm <sup>-1</sup> ) |
| Pyridine       | 0.57  | 3593                           | 108.7                          | 0.21   | 3647                           | 107.9                          |
| TEA            | 0.60  | 3592                           | 97.9                           | 0.60   | 3647                           | 115.9                          |
| DMF            | 0.94  | 3589                           | 131.6                          | 0.47   | 3647                           | 104.5                          |
| acetone        | 1.59  | 3604                           | 166.3                          | 0.43   | 3647                           | 110.0                          |
| air            | 1.55  | 3647                           | 117.5                          |        | —                              |                                |

---

| <b>BTSE</b>    |       | Peak 1                         |                                | Peak 2 |                                |                                |
|----------------|-------|--------------------------------|--------------------------------|--------|--------------------------------|--------------------------------|
| <i>solvent</i> | $A_q$ | $\omega_q$ (cm <sup>-1</sup> ) | $\Gamma_q$ (cm <sup>-1</sup> ) | $A_q$  | $\omega_q$ (cm <sup>-1</sup> ) | $\Gamma_q$ (cm <sup>-1</sup> ) |
| Pyridine       | 1.25  | 3590                           | 133.0                          | 0.79   | 3665                           | 143.0                          |
| TEA            | 1.07  | 3590                           | 121.9                          | 0.51   | 3655                           | 100.8                          |
| DMF            | 0.87  | 3589                           | 120.5                          | 1.01   | 3665                           | 133.3                          |
| acetone        | 1.10  | 3601                           | 123.4                          | 0.98   | 3665                           | 146.4                          |
| air            | 2.78  | 3655                           | 131.9                          |        | —                              |                                |

---

| <b>TMOS</b>    |       | Peak1                          |                                | Peak2 |                                |                                |
|----------------|-------|--------------------------------|--------------------------------|-------|--------------------------------|--------------------------------|
| <i>solvent</i> | $A_q$ | $\omega_q$ (cm <sup>-1</sup> ) | $\Gamma_q$ (cm <sup>-1</sup> ) | $A_q$ | $\omega_q$ (cm <sup>-1</sup> ) | $\Gamma_q$ (cm <sup>-1</sup> ) |
| Pyridine       | 0.48  | 3597                           | 161.0                          | 0.45  | 3665                           | 120.0                          |
| TEA            | 0.82  | 3593                           | 115.0                          | 0.05  | 3665                           | 122.2                          |
| DMF            | 0.67  | 3598                           | 119.4                          | 0.42  | 3665                           | 131.0                          |
| acetone        | 1.41  | 3604                           | 140.0                          | 0.10  | 3665                           | 120.0                          |
| air            | 1.76  | 3665                           | 136.8                          |       | —                              |                                |

**Table S2.** Fitting summary table for SFG spectra collected for 10 wt% dicyandiamide DMF solution in contact with TMOS-treated, BTSE-treated, and OTS-treated  $\text{AlO}_x$  surfaces shown in Figure 8.

|      | Peak 0 |                                    |                                    | Peak 1 |                                    |                                    | Peak 2 |                                    |                                    |
|------|--------|------------------------------------|------------------------------------|--------|------------------------------------|------------------------------------|--------|------------------------------------|------------------------------------|
|      | $A_q$  | $\omega_q$<br>( $\text{cm}^{-1}$ ) | $\Gamma_q$<br>( $\text{cm}^{-1}$ ) | $A_q$  | $\omega_q$<br>( $\text{cm}^{-1}$ ) | $\Gamma_q$<br>( $\text{cm}^{-1}$ ) | $A_q$  | $\omega_q$<br>( $\text{cm}^{-1}$ ) | $\Gamma_q$<br>( $\text{cm}^{-1}$ ) |
| OTS  | 0.04   | 3300                               | 20                                 | 1.81   | 3547                               | 134.9                              | 0.86   | 3647                               | 107.9                              |
| BTSE | 0.03   | 3300                               | 20                                 | 1.76   | 3547                               | 96.7                               | 1.37   | 3665                               | 115.6                              |
| TMOS | 0.04   | 3300                               | 20                                 | 1.27   | 3539                               | 120                                | 0.44   | 3665                               | 120.0                              |
